# Supplementary material
Source: publisher figshare collection journal article supplement (https://sage.figshare.com/ndownloader/files/13023275)

**[Supplementary data]**

**Point-of-Care Coagulation Testing for Reducing In-Hospital Delay in Thrombolysis**

**Supplementary Figure 1.** The POC-INR device (CoaguChek® XS Pro)

**
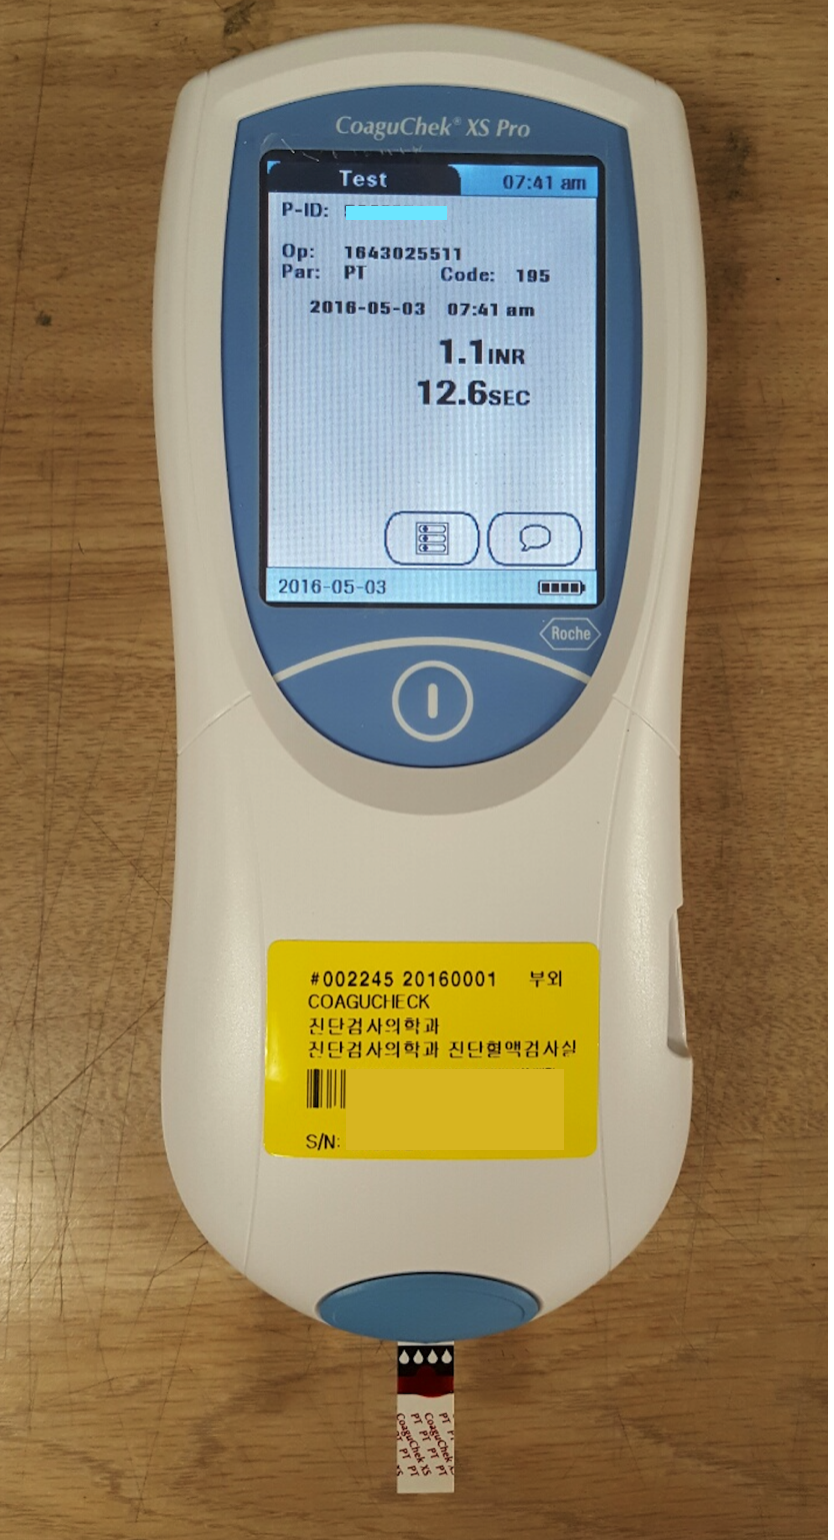
**

**Supplementary Figure 2.** Patient selection


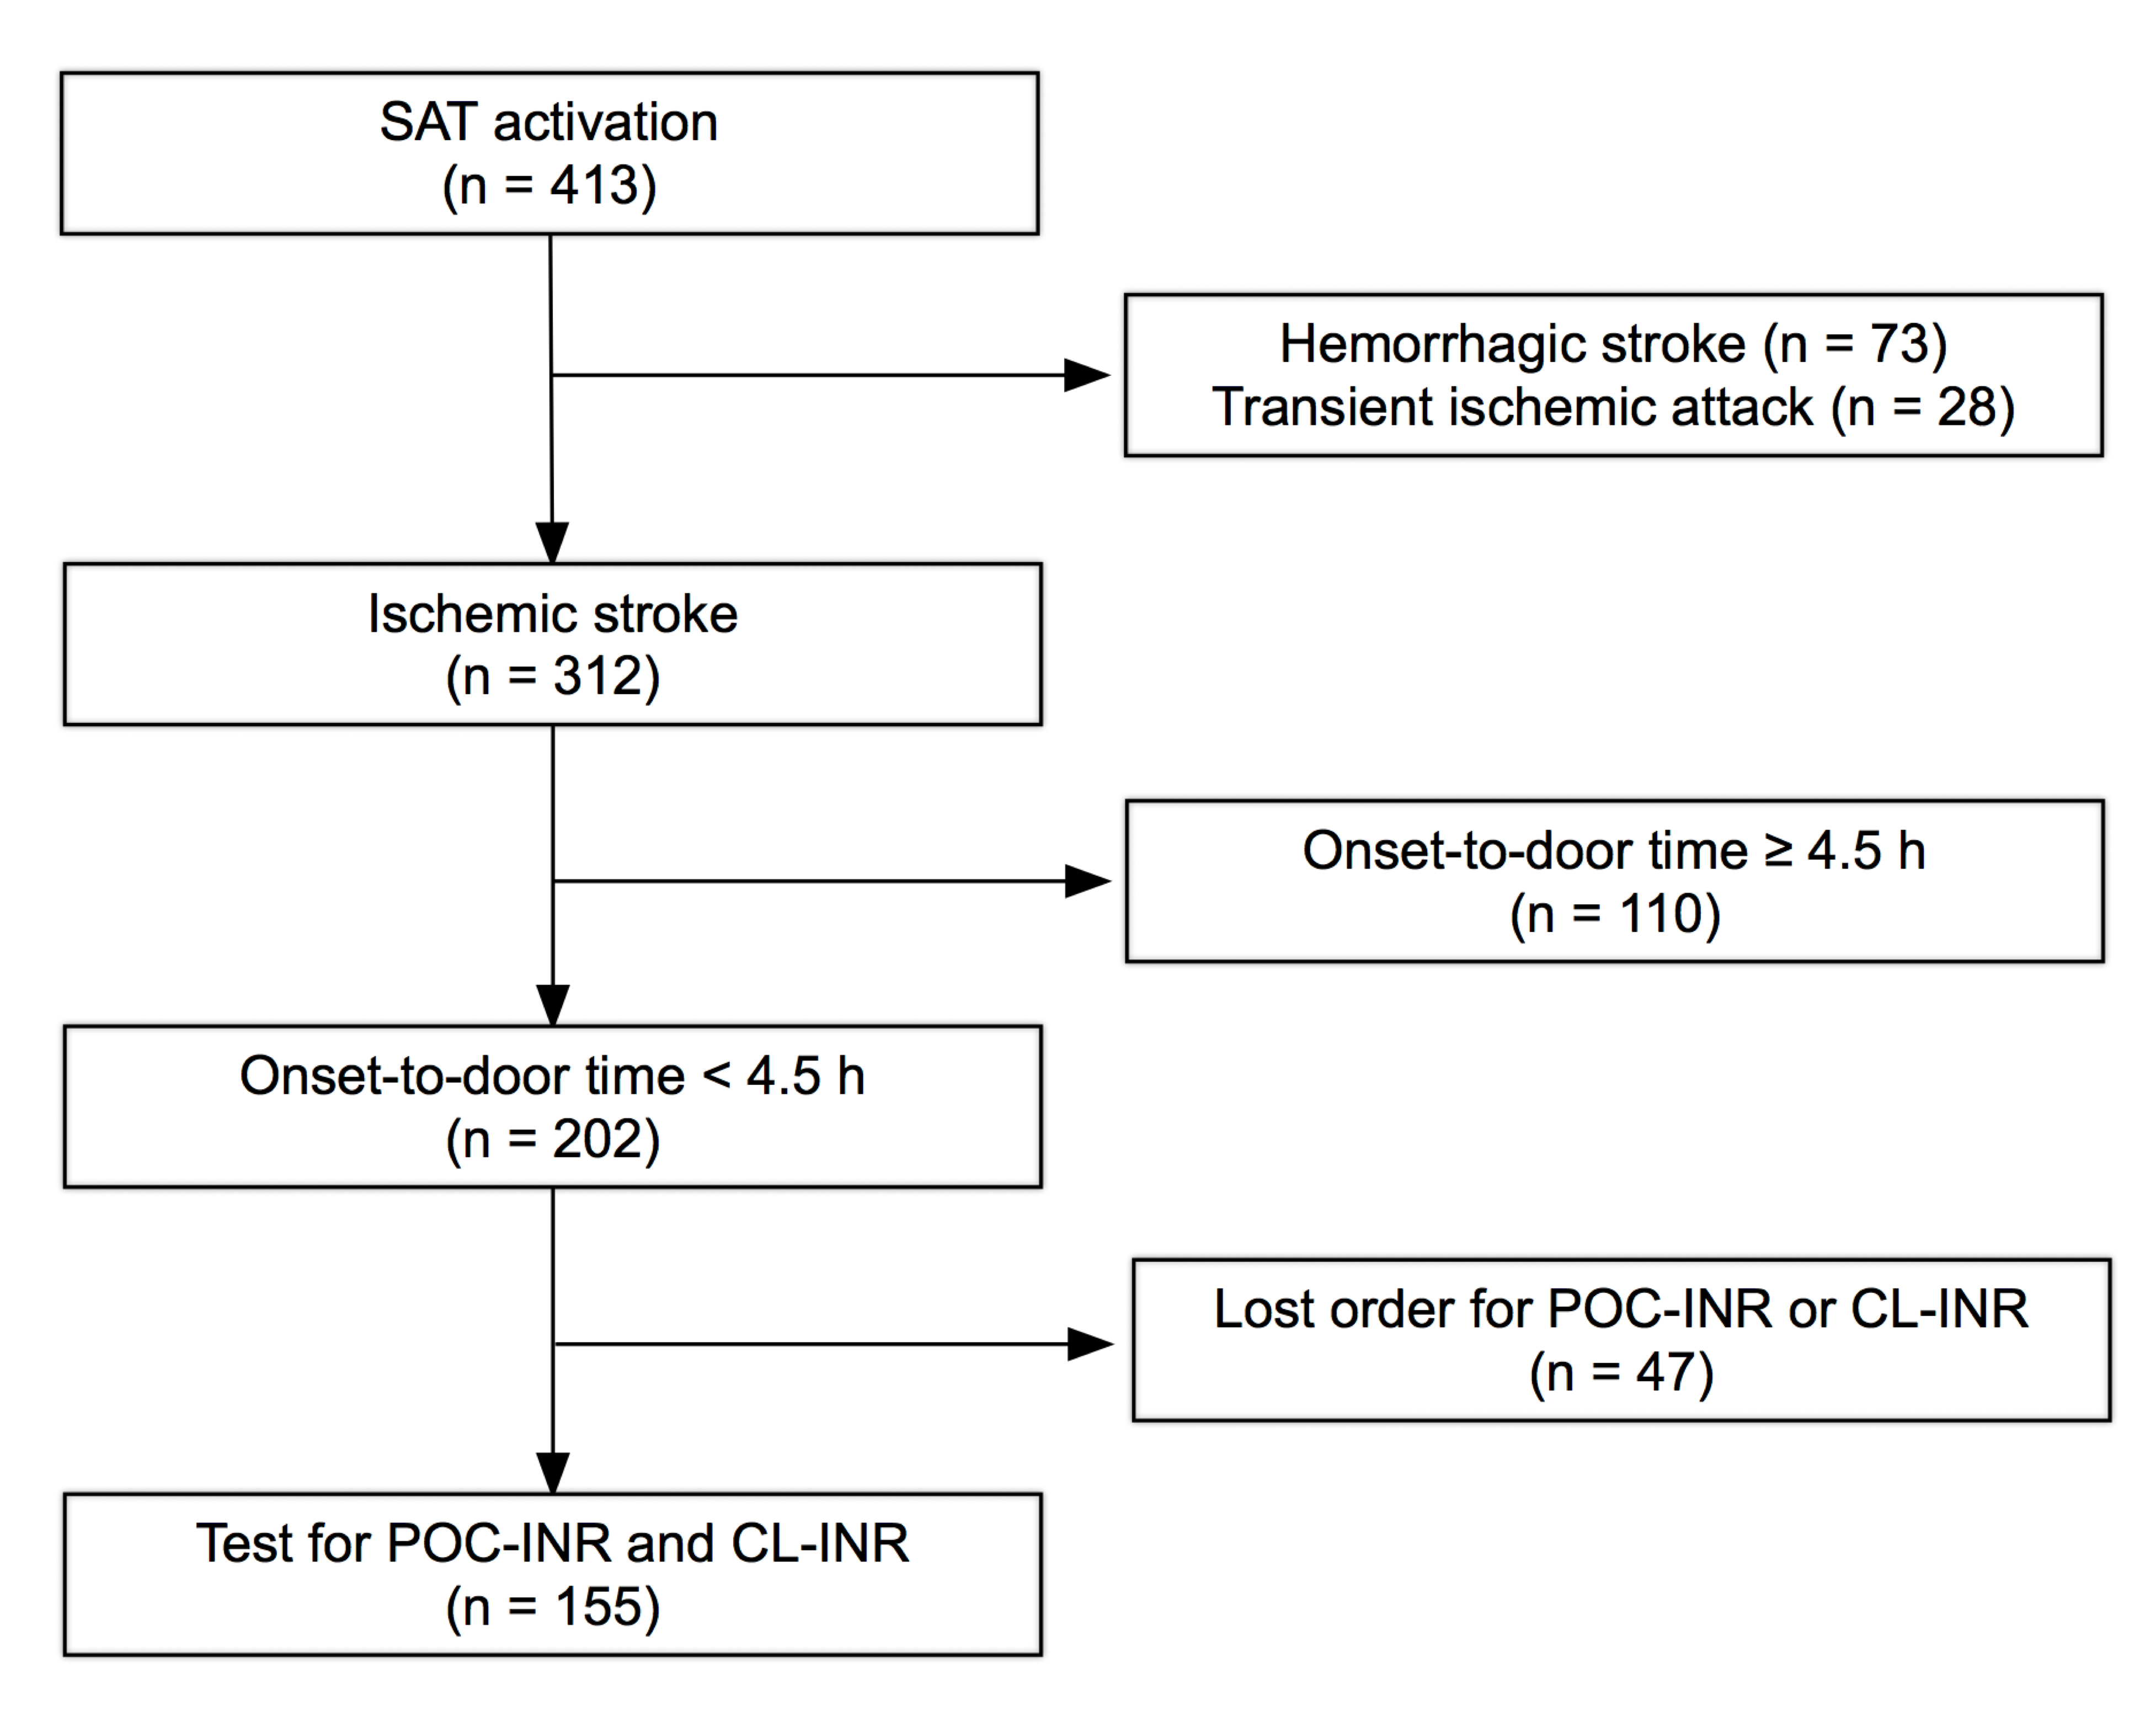

Supplement: Supplementary file 1 [file 13023275]
